# Supplementary material
Source: publisher figshare collection journal article supplement (https://sage.figshare.com/ndownloader/files/14752358)
Supplement: Supplementary file 1 [file 14752358]

**Appendix**

Appendix Table 1: Comparative Agendas Project coding and think tank white paper examples

|  | | |
| --- | --- | --- |
| Major Topic Area | Example | Think Tank |
| Agriculture | "Food Safety: Background, Analysis and Recommendations" | American Enterprise Institute |
| Civil Rights | "The Unintended Consequences of Section 5 of the Voting Rights Act" | American Enterprise Institute |
| Commerce | "Is There a Way to Create a Transatlantic Securities Market?" | American Enterprise Institute |
| Defense | "Afghanistan: Zero Troops Should Not Be an Option" | Heritage Foundation |
| Education | "The Future of Teacher Compensation" | Center for American Progress |
| Energy | "Evaluating the Case for Renewable Energy: Is Government Support Warranted?" | Cato Institute |
| Environment | "Impact of the Waxman-Markey Climate Change Legislation on the States" | Heritage Foundation |
| Foreign Affairs | "To Pay Ransom or Not to Pay Ransom?" | New America Foundation |
| Gov. Operations | "Privatizing the U.S. Postal Service" | Cato Institute |
| Health | Health Policy Brief: Governance Issues for Health Insurance Exchanges | Center on Budget and Policy Priorities |
| Housing | "Retrofitting Foreclosed Homes: A Matter of Public Trust" | Center for American Progress |
| Immigration | A Bureaucratic Nightmare: The Senate's Temporary Guest Worker Program | Heritage Foundation |
| Labor | "Pay Laws Making a Difference Across U.S." | Economic Policy Institute |
| Law and Crime | "Why Prohibitions on Internet Gambling Won’t Work" | Cato Institute |
| Macroeconomics | "A Territorial Tax System Would Create Jobs and Raise Wages for U.S. Workers" | Heritage Foundation |
| Public Lands | "A Continued Push for Reform Is Needed on Public Lands’ Energy Leasing" | Center for American Progress |
| Science and Comm. | FCC Comments on “Specialized Services” and Wireless Open Internet Rules | New America Foundation |
| Social Welfare | "Would Private Accounts Provide A Higher Rate Of Return than Social Security?" | Center on Budget and Policy Priorities |
| Trade | "Currency Manipulation and the 896,600 U.S. Jobs Lost Due to the U.S.-Japan Trade Deficit" | Economic Policy Institute |
| Transportation | "Fix the Drains (and Trains and Bridges)—and Train the Fixers" | Manhattan Institute |

| Appendix Table 2: Issue Ownership Values by Comparative Agendas Project Major Policy Topic Area | | |
| --- | --- | --- |
| Major Topic Area | Egan (2013)12 | Binary Ownership3 |
| Agriculture | 0 | Neither |
| Civil Rights | n/a | n/a |
| Defense | 14 | Republican |
| Domestic Commerce | n/a | Republican |
| Education | -10 | Democratic |
| Energy | -3 | Neither |
| Environment | -18 | Democratic |
| Foreign Affairs | 6 | Republican |
| Government Operations | 0 | Neither |
| Health Care | -12 | Democratic |
| Housing | n/a | Democratic |
| Immigration | 9 | Republican |
| Labor | -12 | Democratic |
| Law and Crime | 7 | Republican |
| Macroeconomics | 1 | Both |
| Public Lands | 0 | Neither |
| Science and Communication | 0 | Neither |
| Social Welfare | -14 | Democratic |
| Trade | 5 | Republican |
| Transportation | 0 | Neither |
| 1 Values are the coefficient on Egan's (2013) estimate of long-run issue ownership coefficients in public opinion surveys. Negative scores are more Democratic, positive scores are more Republican. Defense is assigned the average of Egan's "Domestic Security" and "Military" category. Macroeconomics is assigned the average of “Inflation,”, “Taxes,” “Economy,” “Jobs,” and “Inequality” categories. Agriculture, government operations, public lands, science and communication and transportation policy were coded=0. No data exist for these areas, all of which tend to have very low levels of party polarization and issue salience (Jochim & Jones, 2013). | | |
